# Supplementary material for: A glucose biosensor based on glucose oxidase immobilized on three-dimensional porous carbon electrodes
Source: Royal Society of Chemistry journal article supplement (doi:10.1039/c5an00200a), 2015-01-01
Supplement: c5an00200a1.pdf [file c5an00200a1.pdf]

# Supporting Information

## **A Glucose Biosensor based on Immobilization of Glucose Oxidase on Three-Dimensional Macroporous Carbon Electrodes**

Jingyi Chen, Rong Zhu, Jia Huang, Man Zhang, Hongyu Liu, Min Sun, Li Wang and Yonghai Song\*

*Key Laboratory of Functional Small Organic Molecule, Ministry of Education, Key Laboratory of  
Chemical Biology, Jiangxi Province, College of Chemistry and Chemical Engineering, Jiangxi  
Normal University, Nanchang, 330022, China.*

---

\*Corresponding author: Tel/Fax: +86 791 88120861. E-mail: yhsonggroup@hotmail.com (Y. Song).

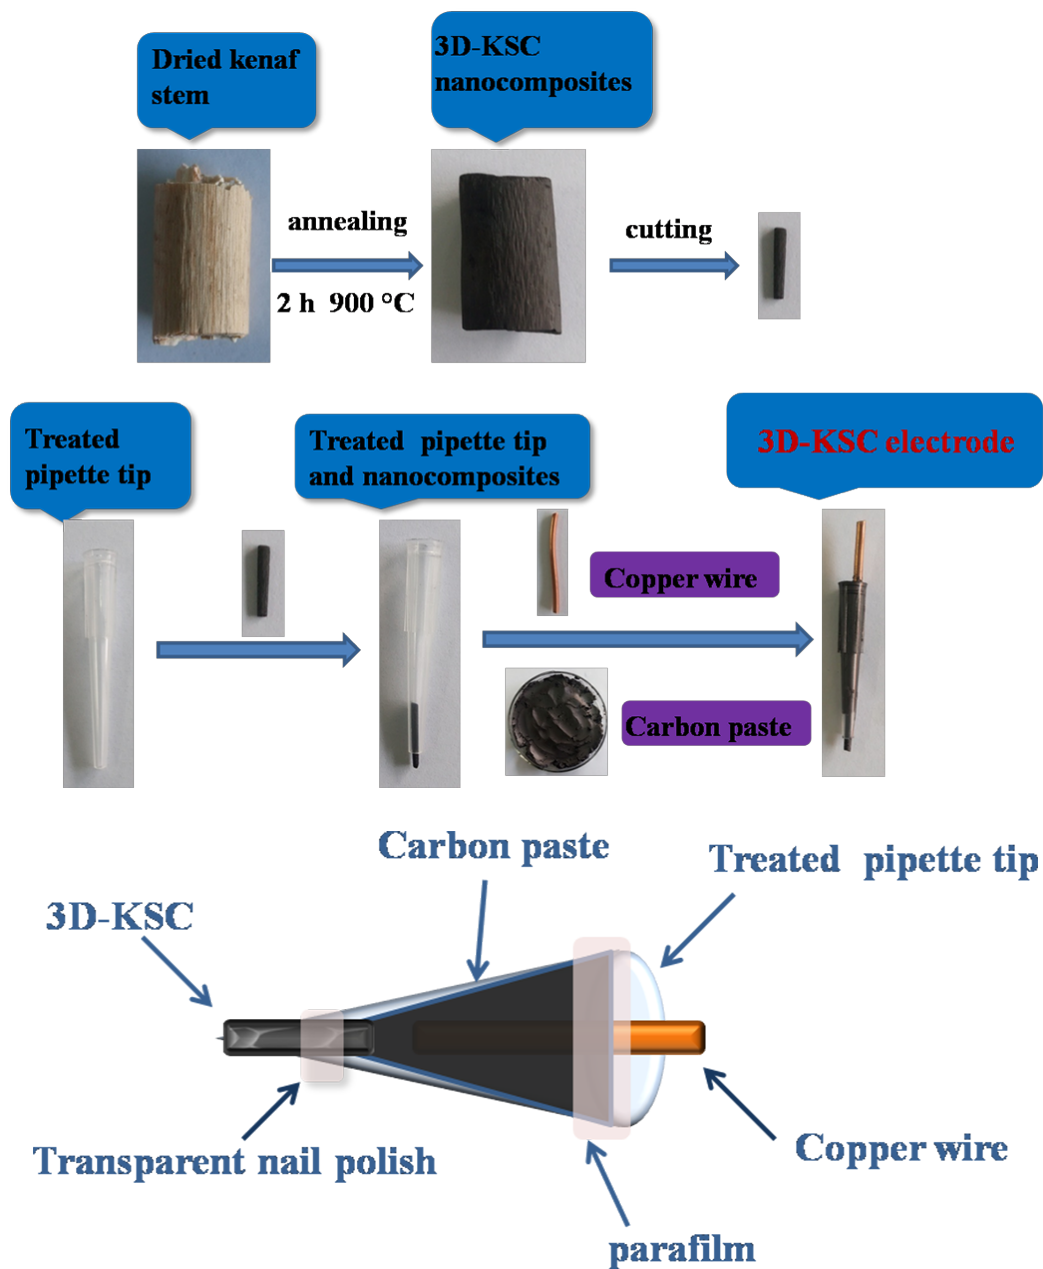

**Fig. S1.** Schematic illustration of the fabrication and structure of the 3D-KSC/GOD electrode.

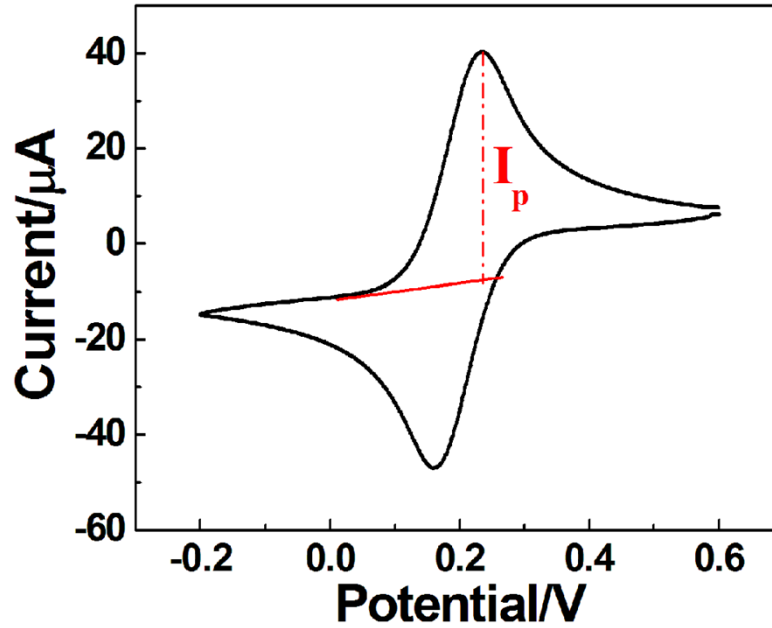

**Fig. S2.** CVs of 3D-KSC electrode in 0.1 M KCl solution containing 5.0 mM  $\text{Fe}(\text{CN})_6^{3-/4-}$  at 50  $\text{mV s}^{-1}$ .

The effective surface areas ( $A_{\text{eff}}$ ) of various 3D-KSC were estimated before use based on the CVs in 0.1 M KCl solution containing 5.0 mM  $\text{Fe}(\text{CN})_6^{3-/4-}$  at 0.05  $\text{V s}^{-1}$  according to Randles-Sevcik equation:

$$I_p = 2.69 \times 10^5 A n^{3/2} D_0^{1/2} \nu^{1/2} C_0 \quad (1)$$

where  $n$  is the number of electrons participating in the redox ( $n=1$  for  $\text{Fe}(\text{CN})_6^{3-/4-}$ ),  $D_0$  is the diffusion coefficient of the molecule in a solution ( $0.673 \times 10^{-5} \text{ cm}^2 \text{ s}^{-1}$  for  $\text{Fe}(\text{CN})_6^{3-/4-}$  in 0.1 M KCl solution),  $C_0$  is the bulk concentration of the redox probe ( $C_0 = 5 \text{ mM}$  of the  $\text{Fe}(\text{CN})_6^{3-/4-}$ ). As shown in Fig. S2, the  $I_p$  was calculated to be 47.41 and accordingly the value of  $A_{\text{eff}}$  for the 3D-KSC electrode was estimated to be  $0.0607 \text{ cm}^2$ .

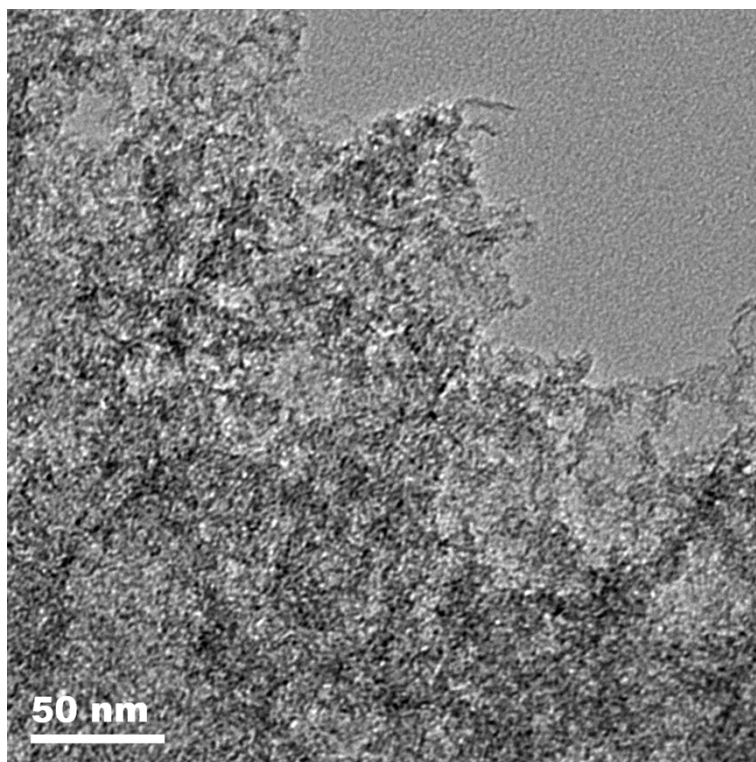

**Fig. S3** TEM images of 3D-KSC.

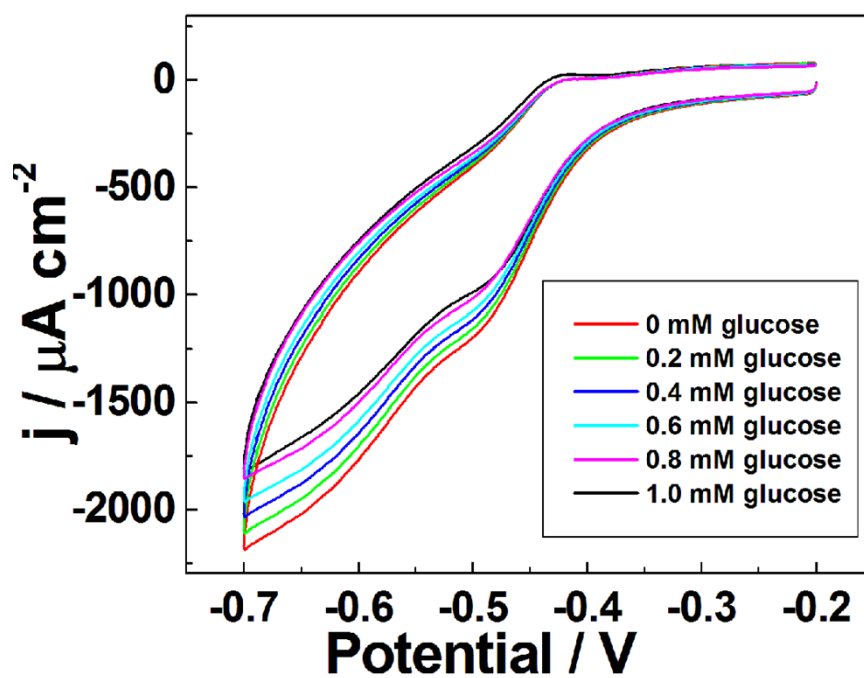

**Fig. S4.** CVs of the 3D-KSC/GOD electrode in 0.2 M  $\text{O}_2$ -saturated PBS (pH 7.0) at scan rate of  $0.05 \text{ V s}^{-1}$  in the presence of glucose with small concentrations.

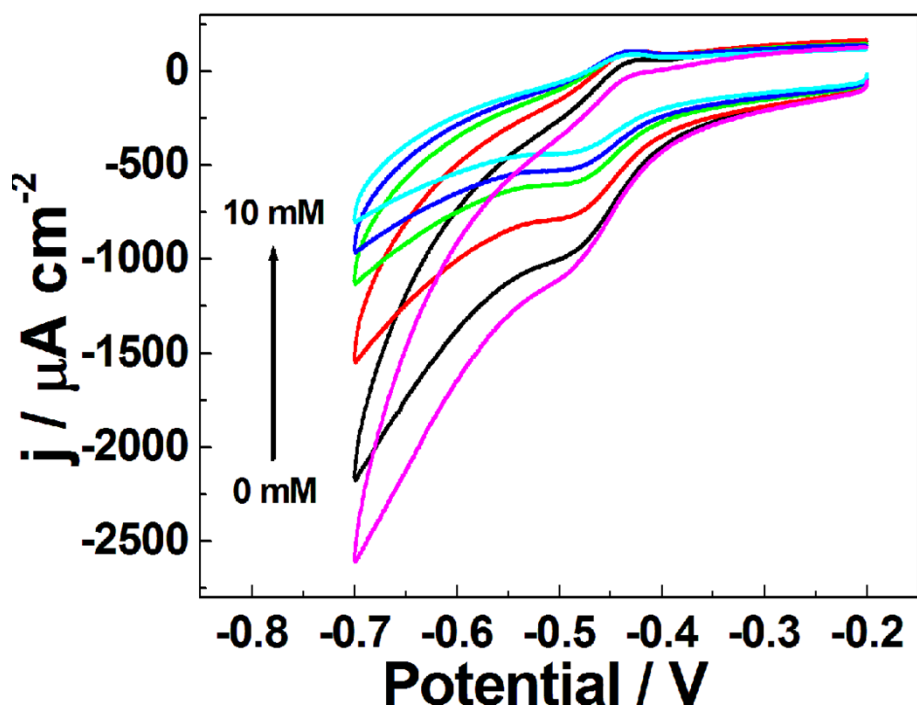

**Fig. S5.** (A) CVs of the 3D-KSC/GOD electrode, which made by different batches of pyrolyzed kenaf stems, in 0.2 M  $\text{O}_2$ -saturated PBS (pH 7.0) at scan rate of  $0.05 \text{ V s}^{-1}$  in the presence of glucose with various concentrations

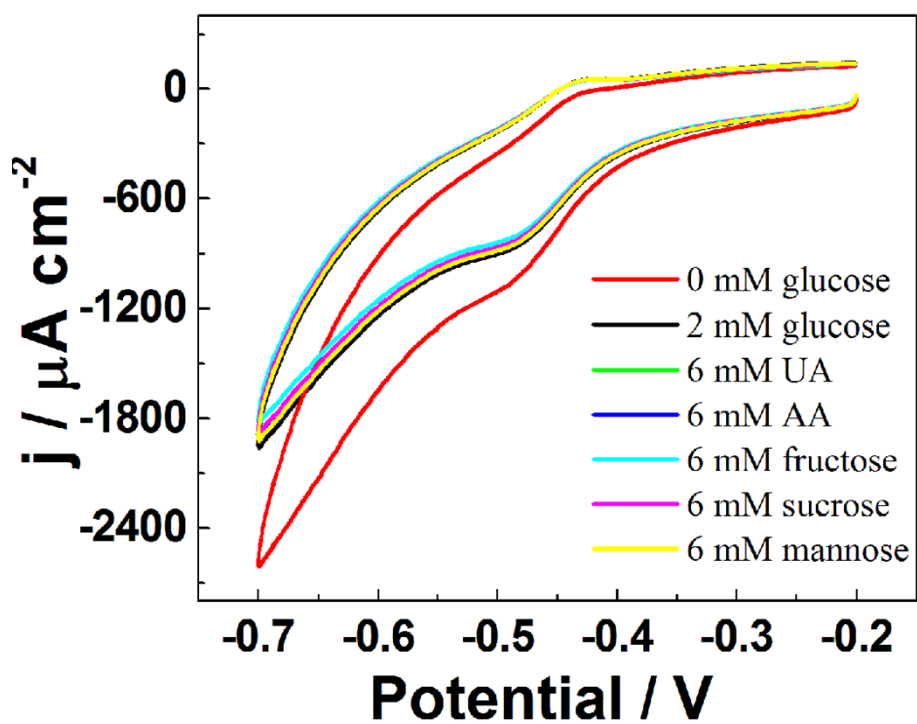

**Fig. S6.** CVs response of 3D-KSC/GOD in 0.2 M  $\text{O}_2$ -saturated PBS in the presence of glucose and other interfering substances.

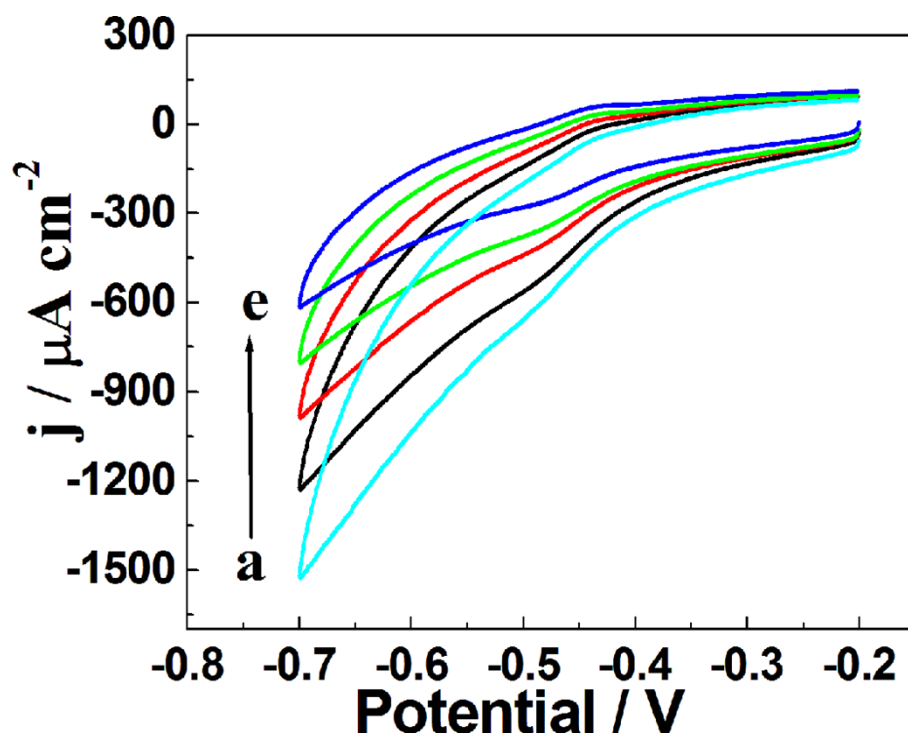

**Fig. S7** Determination of (a) glucose concentration in blood serum sample in the presence of (a) 0 mM; (b) 2.0 mM; (c) 4.0 mM; (d) 6.0 mM; (e) 8.0 mM glucose standard solution using the 3D-KSC/GOD electrode.



**Table S1** Determination of glucose concentration in blood serum samples using the 3D-KSC/GOD electrode.

| NO. | Added (mM) | Found (mM) | RSD (%) | Recovery (%) |
|-----|------------|------------|---------|--------------|
| 1   | 2.0        | 2.18       | 4.47    | 109.0        |
| 2   | 4.0        | 4.01       | 1.12    | 100.2        |
| 3   | 6.0        | 5.86       | 3.01    | 97.7         |
| 4   | 8.0        | 7.88       | 2.66    | 98.5         |
